# Supplementary material for: CmHem, a hemolin-like gene identified from Cnaphalocrocis medinalis, involved in metamorphosis and baculovirus infection
Source: PeerJ. 2023 Oct 4;11:e16225. doi: 10.7717/peerj.16225 (PMC10559889; doi:10.7717/peerj.16225)
Supplement: Supplemental Information 1 [file peerj-11-16225-s001.xlsx]

## Sheet: Sheet1
	Fig. 3
	eggs	1st	2nd	3rd	4th	5th	pupae	adults
	350.218	1.22291	2.33999	13.4715	4.14508	1.38446	27.399	122.86
	238.839	3.33822	2.04761	11.7306	4.31088	1.46736	35.7306	128.207
	304	1.64671	3.83367	9.78238	13.0984	0.52228	145.907	106.155
	347.792	3.39269	6.11569	9.11917	10.2383	0.625907	154.487	39.3368		fold change
AVE.	310.212	2.40013	3.58424	11.0259	7.94819	1	90.8808	99.1399		310.212	3.4134	3.12904
	Fig. 5 B
	CKLaF	CmInfF12	CmInfF24	CmInfF48	CmInfF96
	1.10073	0.985942	5.13785	0.609669	1.13335
	1.18097	0.927913	5.81205	0.797919	1.05438
	1.23686	1.65311	4.82406	0.726322	1.75133		fold change
AVE.	1.17285	1.18899	5.25798	0.711303	1.31302		4.48308
	Fig. 5 A
	CKLaM	CmInfM12	CmInfM24	CmInfM48	CmInfM96
	1.57972	22.2718	1.3368	2.33204	1.78986
	1.61349	21.5637	1.23885	2.9715	0.94571
	1.83116	20.2859	0.890029	1.60463	0.87808
	0.17376	27.6675	1.45143	1.65435	0.902712
	0.193919	27.6186	1.38227	1.67314	1.2134		fold change
AVE.	1.07841	23.8815	1.25987	2.04713	1.14595		22.1451
	Fig. 4
	CK	si-48 h
	1.017	0.615646
	1.279	0.466399
	1.197	0.605938
